1  
2  
3  
4  
5  
6  
7  
8  
9  
10  
11  
12  
13  
14  
15  
16  
17  
18  
19  
20  
21  
22  
23  
24  
25

# Interpreting coronary artery disease GWAS results: A functional genomics approach assessing biological significance

Katherine Hartmann<sup>1\*#a</sup>, Michał Seweryn<sup>2</sup>, Wolfgang Sadee<sup>1</sup>

<sup>1</sup> Department of Cancer Biology and Genetics, Center for Pharmacogenomics, College of Medicine, The Ohio State University, Columbus, OH, USA

<sup>2</sup> Biobank Lab, Department of Molecular Biophysics, University of Lodz, Poland

<sup>#a</sup> Current Address: Department of Internal Medicine, Santa Clara Valley Medical Center, San Jose, CA, USA

\* Corresponding Author

E-mail: [hartmann.kate@gmail.com](mailto:hartmann.kate@gmail.com) (KH)

## 26 **Abstract**

27       Genome-wide association studies (GWAS) have implicated 58 loci in coronary artery  
28 disease (CAD). However, the biological basis for these associations, the relevant genes, and  
29 causative variants often remain uncertain. Since the vast majority of GWAS loci reside outside  
30 coding regions, most exert regulatory functions. Here we explore the complexity of each of  
31 these loci, using tissue specific RNA sequencing data from GTEx to identify genes that exhibit  
32 altered expression patterns in the context of GWAS-significant loci, expanding the list of  
33 candidate genes from the 75 currently annotated by GWAS to 245, with almost half of these  
34 transcripts being non-coding. Tissue specific allelic expression imbalance data, also from GTEx,  
35 allows us to uncover GWAS variants that mark functional variation in a locus, e.g., rs7528419  
36 residing in the *SORT1* locus, in liver specifically, and rs72689147 in the *GUYC1A1* locus,  
37 across a variety of tissues. We consider the GWAS variant rs1412444 in the LIPA locus in  
38 more detail as an example, probing tissue and transcript specific effects of genetic variation in  
39 the region. By evaluating linkage disequilibrium (LD) between tissue specific eQTLs, we reveal  
40 evidence for multiple functional variants within loci. We identify 3 variants (rs1412444,  
41 rs1051338, rs2250781) that when considered together, each improve the ability to account for  
42 LIPA gene expression, suggesting multiple interacting factors. These results refine the  
43 assignment of 58 GWAS loci to likely causative variants in a handful of cases and for the  
44 remainder help to re-prioritize associated genes and RNA isoforms, suggesting that ncRNAs  
45 maybe a relevant transcript in almost half of CAD GWAS results. Our findings support a multi-  
46 factorial system where a single variant can influence multiple genes and each genes is  
47 regulated by multiple variants.

48

## 49 **Introduction**

50           Genome-wide association studies (GWAS) have identified dozens of genetic variants  
51 (SNPs) associated with cardiovascular disease risk and related clinical phenotypes (*e.g.*, blood  
52 pressure, lipid levels) (1–3). However, these findings do not necessarily translate to  
53 understanding of heritability, likely because we do not fully understand the link between  
54 significant loci, causative genetic variants and complex phenotypes (4). Moreover, the  
55 functional variant and even the relevant gene close to a significant locus in many cases remain  
56 uncertain. The majority of statistically significant SNPs reside in non-coding regions with poorly  
57 defined biological functions and a complex architecture of multiple genes and transcripts (5).  
58 Gene assignment is largely based on proximity, usually with little consideration for non-coding  
59 transcripts in the locus or the possibility of chromatin looping that places distant regions in close  
60 proximity (6), with regulatory domains often interacting with multiple genomic target regions (9).  
61 Additionally, localization to non-coding regions means the mechanisms remain unknown as the  
62 function is not immediately obvious, while implicating epigenetics and other regulatory  
63 processes (5,7). This uncertainty limits the utility of GWAS findings. To interpret and refine  
64 GWAS results for coronary artery disease (CAD), we use RNA expression, in addition to  
65 physical position, to prioritize the variants and gene(s) most likely to be relevant.

66           Although largely thought of in a single SNP – single protein-coding gene paradigm,  
67 GWAS variants mark regions with various degrees of complexity often including several protein-  
68 coding and non-coding RNAs (ncRNAs). SNPs located within RNA exons may not only alter the  
69 protein sequence but also influence RNA structure and function in a transcript specific manner  
70 (8). Some of these GWAS loci consist of gene clusters that are coordinately regulated (9), and  
71 almost all include multiple RNA isoforms expressed from a given gene, including splice  
72 isoforms. Within such multi-gene regions, a single variant may affect more than one gene, both  
73 protein-coding and non-coding, via chromatin looping between multiple sites or by regulating  
74 DNA accessibility for the entire region (9,10). Therefore, a critical question for interpreting

75 GWAS associations is which gene(s), and what specific transcript(s), are affected within each  
76 significant locus.

77         The potential for multiple variants to affect a single gene is also critical to the  
78 interpretation of GWAS. Such interactions between variants, either linear or dynamic (epistasis)  
79 and dictated by linkage disequilibrium (LD), may remain hidden in GWAS because of the  
80 restrictive nature of multiple hypotheses corrections; however targeted analysis of loci reveals  
81 multiple interacting variants modulating gene expression (9,11,12). Failure to identify all main  
82 functional variants in a gene locus and their interactions results in false estimates of the genetic  
83 influence of a locus, and further impedes discovery of dynamic interactions that are sensitive to  
84 partial or confounded estimates (13–18).

85         Detailed analysis of RNA expression to evaluate GWAS results is increasingly employed  
86 to evaluate co-localization of GWAS and eQTL signals (19–21). However, most methods rely  
87 on the a *priori* assumptions that variants are independent of each other (e.g., eCAVIAR), while  
88 COLOC assumes that there is only one functional variant per GWAS locus. These assumptions  
89 do not allow for a multifactorial system, where a single variant can influence multiple genes and  
90 each gene can be regulated by multiple variants. Accordingly, we search for overlap between  
91 variants marking GWAS associations and those marking eQTLs rather than using existing  
92 methods to co-localize signals. Although this approach limits our power to detect overlap as it  
93 requires a single variant appear as a marker in both GWAS and eQTL analysis, we posit it  
94 facilitates functional exploration of a multi-factorial system.

95         A recent CAD GWAS used 1000 genomes to impute insertions/deletions, rare variants  
96 and common variants that were not directly genotyped as part of a large-scale meta-analysis of  
97 185 thousand cases and controls (1). While confirming 47 of the 48 previously identified loci,  
98 this study identified an additional 10 at genome-wide significance, bringing the total count of  
99 CAD associated loci to 58. Each of these loci are based on robust statistical associations for  
100 one or more SNPs in the locus. Furthermore, each locus has been assigned one or more

101 genes based largely on proximity as part of the GWAS annotation. We consider each of these  
102 58 loci in detail, using QTL and position to re-prioritize candidate genes and focusing on a  
103 subset of loci, to begin resolving inherent complexities of genomic architecture.

104

## 105 **Materials and Methods**

### 106 **Data**

#### 107 **1000 Genomes**

108 Genotypes for calculating LD between SNPs of interest were downloaded from:  
109 [http://ftp.1000genomes.ebi.ac.uk/vol1/ftp/release/20130502/supporting/GRCh38\\_positions/](http://ftp.1000genomes.ebi.ac.uk/vol1/ftp/release/20130502/supporting/GRCh38_positions/).  
110 Individuals of the 'EUR' superpopulation were selected for LD calculations.

#### 111 **CATHeritization GENetics (CATHGEN)**

112 Expression, genotypes, and clinical phenotypes were acquired via dbGaP Project #5358  
113 (dbGaP accession phs0000703). Expression levels had been determined using Illumina  
114 HumanHT-12-v3 in RNA from whole blood. We considered variables recorded in pht003672:  
115 age (phv00197199), gender (phv00197207), hypercholesterolemia (phv00197204), smoking  
116 (phv00197208), number of diseased vessels (phv00197295), and history of myocardial  
117 infarction (MI) (phv00197212). We restricted analysis to Caucasians (race (phv00197206)) for  
118 sample size considerations (862 Caucasians; 259 African Americans). The approach developed  
119 here can be extended to other ethnic groups as these datasets become available. Data access  
120 was approved by the Ohio State University IRB (Protocol #2013H0096).

#### 121 **Genotype and Tissue Expression Project (GTEx)**

122 Tissue-specific RNAseq data was acquired via dbGaP Project #5358 (dbGaP accession  
123 phs000424). For details see Lonsdale et al. and  
124 <http://www.gtexportal.org/home/documentationPage> (22). MI was defined as recorded history of

125 heart disease (MHHRTDIS) or heart attack (MHHRTATT). Data access was approved by the  
126 Ohio State University IRB (Protocol #2013H0096).

## 127 **Gene Information**

128 Transcripts, coding status, GO Ids, number of publications indexed in PubMed,  
129 gene/transcript expression, GWAS hits, GTEx eQTLs (expression quantitative trait loci) and  
130 sQTLs (splicing quantitative trait loci) including tissue specific expression, and allelic ratios in  
131 DNase hypersensitivity sites were obtained for each gene using the package 'mgIR'  
132 implemented in R (<https://cran.r-project.org/web/packages/mgIR/index.html>). Protein-coding  
133 transcripts were defined as those annotated by BiomaRt as "IGC gene", "IGD gene", "IG gene",  
134 "IGJ gene", "IGLV gene", "IGM gene", "IGV gene", "IGZ gene", "nonsense\_mediated\_decay",  
135 "nontranslating CDS", "non stop decay", "polymorphic pseudogene", "TRC gene", "TRD gene",  
136 "TRJ gene", "protein\_coding", "TEC". The remaining designations were considered non-coding  
137 and include "disrupted domain", "IGC pseudogene", "IGJ pseudogene", "IG pseudogene", "IGV  
138 pseudogene", "processed\_pseudogene", "transcribed\_processed\_pseudogene", "transcribed  
139 unitary pseudogene", "transcribed\_unprocessed\_pseudogene", "translated processed  
140 pseudogene", "TRJ pseudogene", "unprocessed\_pseudogene", "unitary\_pseudogene", "3prime  
141 overlapping ncna", "ambiguous orf", "antisense", "antisense RNA", "lincRNA", "ncna host",  
142 "processed\_transcript", "sense intronic", "sense overlapping", "lincRNA", "retained\_intron",  
143 "miRNA", "miRNA\_pseudogene", "miscRNA", "miscRNA\_pseudogene", "Mt rRNA", "Mt tRNA",  
144 "rRNA", "scRNA", "snlRNA", "snoRNA", "snRNA", "tRNA", "tRNA\_pseudogene", and  
145 "rRNA\_pseudogene". A gene was considered non-coding only if all transcripts were non-coding.

## 146 **Linkage Disequilibrium (LD)**

147  $R^2$  was calculated for 1000 genomes 'EUR' super population using the 'ld' function from  
148 the package 'snpStats' implemented in R and using LDlink.

## 149 **Association Testing**

150 Additive logistic models to account for LIPA expression and MI using different  
151 combinations of variants were compared using ANOVA with a likelihood ratio test (LRT)  
152 implemented in R. Gender and age were included as covariates in models explaining LIPA gene  
153 expression, while sex, age, hypercholesterolemia, smoking, and number of diseased vessels  
154 were included as covariates in models explaining MI. Differences in LIPA expression between  
155 those with or without a history of MI were calculated using the `wilcoxin.test` function in R.  
156 Bonferroni multiple hypothesis correction was implemented.

## 157 **Allelic Expression Imbalance (AEI)**

158 Allelic RNA expression imbalance (AEI) was assessed using data from GTEx  
159 (`phe000039.v1.GTEx_v8_ASE.expression-matrixfmt-ase.c1`). Candidate variants were  
160 subsetted from each individual file, and the deviation of the “REF\_RATIO” from the  
161 “NULL\_RATIO” was plotted for each variant in a given tissue type. Tissue types with 5 or more  
162 samples were considered.

163

## 164 **Results and discussion**

### 165 **Expanding candidate gene lists using QTL and position**

166 As many functional variants marked by GWAS likely have regulatory functions affecting  
167 RNA expression or processing, the same SNPs appearing in GWAS may also mark expression  
168 Quantitative Trait Loci (eQTLs) or splicing Quantitative Trait Loci (sQTLs) for their target gene.  
169 To assign GWAS hits to target genes, we determine for each of the GWAS SNPs whether it  
170 appears as an eQTL or sQTL reported by GTEx, searching all available tissues. Recognizing  
171 that often multiple SNPs exist over a genomic region as significant GWAS hits, we consider  
172 each one individually in assigning candidate genes and separately assess concordance. We opt

173 not to use COLOC and other existing tools that search for overlapping signal between GWAS  
174 variants and QTLs because they make assumptions about the genetic model that are not in line  
175 with the multi-factorial system we test here (23); namely, these methods assume a single  
176 causative variant or that each variant acts independently. Instead, although we recognize it  
177 limits the overlap we are able to detect and biases our sample to variants that are ideal markers  
178 (i.e. frequent), we search for exact matches between GWAS and QTL marker variants. In  
179 addition to evaluating associations with gene expression and splicing, we consider the physical  
180 position of each GWAS variant as SNPs within the RNA sequence are expected to impact RNA  
181 folding, stability, function, etc. Specifically, we consider the corresponding gene for any  
182 transcript that physically overlaps the GWAS variant regardless of strand, thus incorporating  
183 coding, non-coding, and antisense genes. Using these three approaches (cis-eQTLs, cis-  
184 sQTLs, position), we expand the list of potential candidate genes for the 58 GWAS loci from 75  
185 to 245 (Fig 1A, S1 File, comprehensive table is included in S3 File, S1 Fig).

186

187 **Fig 1. Summary of CAD GWAS loci.** (A) For each of the 58 loci identified by GWAS,  
188 number of candidate genes annotated by GWAS and additional genes added by eQTL, then  
189 sQTL, and finally position based reprioritization, if implicating genes other than those annotated  
190 previously by GWAS (See S1 Fig for further details about the approach and S3 File for a  
191 comprehensive table). Tier 1 (n = 7) denotes those loci where a GWAS annotated gene is  
192 supported by QTL-based re-prioritization or position and no other candidate genes are  
193 introduced; Tier 2 (n = 50) where QTL-based reprioritization or position introduces new  
194 associated genes while supporting all candidates at this locus (Tier2A), only some including the  
195 GWAS gene (Tier2B) or new genes except the GWAS genes (Tier2C); and Tier 3 (n = 1) where  
196 no eQTLs or sQTLs are identified and no gene physically overlaps the SNP, accordingly  
197 annotation by GWAS is not supported and no other genes are implicated. (B) For each of the  
198 245 candidate genes displayed along the x-axis (names available in S1 File), the number of



199 transcripts assigned to the gene, the number of antisense transcripts (note: antisense genes are  
200 not included among the 245 candidate genes unless their expression is associated with or they  
201 physically overlap a GWAS variant), GO terms, Papers indexed in PubMed, *cis*-eQTLs and  
202 sQTLs published in v8 of GTEx. Blue bar highlights those genes with only non-coding  
203 transcripts.

204

205 In an effort to identify those loci where a target gene(s) is clearly supported by functional  
206 markers, we consider the agreement between the gene assignment given by GWAS studies  
207 and that derived by eQTL and sQTL analysis as well as by physical position. We group each of  
208 the 58 GWAS loci as follows: GWAS annotation is supported by QTL-based re-prioritization or  
209 position and no other candidate genes are introduced (Tier 1); QTL-based reprioritization or  
210 position introduces new genes, while supporting all (Tier2A), some (Tier2B), or none (Tier2C) of  
211 the genes annotated by GWAS so that multiple genes are implicated; no eQTLs or sQTLs are  
212 identified and no gene or annotated RNA transcript physically overlaps the SNP, accordingly  
213 annotation by GWAS is not supported (but also not negated) and no other genes are implicated  
214 (Tier 3), see Fig 1, S2 Fig, S3 File.

215 In some instances, the number of candidate genes implicated changes substantially with  
216 the particular GWAS SNP considered (S3 File). Nikpay et al. report both the SNP originally  
217 identified in CAD GWAS studies and the most promising SNP in the same locus they identified  
218 in a large-scale meta-analysis using 1000 genomes imputation to incorporate variants with  
219 lower minor allele frequency (1). We consider both in our analysis, and for 11 of 32 loci with  
220 multiple SNPs find the tier classification changes depending on the SNP considered (S3 File).  
221 For example, locus 10 - rs2252641 and rs17678683 (ZEB2, AC074093.1), rs2252641, which  
222 was implicated in historic GWAS studies, is annotated as ZEB2 and AC074093.1, but based on  
223 QTL and position is not associated with any gene and would be considered as Tier3 while  
224 rs17678683, identified by Nikpay et al. is an eQTL in skeletal muscle for ZEB2 and an sQTL in

225 subcutaneous adipose also for ZEB2 and would thus be considered as Tier1. The two SNPs  
226 have an  $R^2 < 0.2$ .

227 This discordance between variants in the same locus may represent a weakness of our  
228 approach that looks for overlap with an individual SNP rather than considering ‘colocalization’  
229 more broadly. However, it occurs almost exclusively among SNPs that are in relatively poor LD  
230 (frequently  $R^2 < 0.2$ ) and would not be expected to serve as good markers for one another nor  
231 be part of the same haplotype. Alternatively, this discordance may represent multiple functional  
232 variants in the locus with different target genes. Regardless, our results emphasize the  
233 complexity in elucidating functional variants from GWAS results.

234

### 235 **Tier 1: No new candidate genes introduced – GWAS annotation supported**

236 For 7 loci, QTL-based reprioritization and/or position supports the GWAS annotation  
237 without introducing new candidate genes, supporting all or some of the gene(s) annotated by  
238 GWAS: locus 16 - rs6903956 (ADTRP), locus 32 - rs11203042 and rs1412444 (LIPA), locus 38  
239 - rs9319428 (FLT1), locus 42 - rs17514846 (FURIN, FES), locus 54 - rs7212798 (BCAS3),  
240 locus 57 - rs11830157 (KSR2), and locus 8 - rs6544713 (ABCG8; however ABCG5 also  
241 annotated by GWAS is not supported by QTL or position) (Table 1).

242

243 **Table 1. Tier 1 CAD GWAS loci**

| <b>Locus</b> | <b>SNP</b> | <b>OR</b>                        | <b>Risk Allele (Freq)</b> | <b>Gene</b> | <b>eQTL Tissue(s)</b> | <b>sQTL Tissue(s)</b> | <b>Position</b>   |
|--------------|------------|----------------------------------|---------------------------|-------------|-----------------------|-----------------------|-------------------|
| 16           | rs6903956  | 1.65 <sup>a</sup><br>(1.44-1.90) | A<br>(0.08 <sup>a</sup> ) | ADTRP       |                       | Testis                | ADTRP<br>(intron) |

|    |            |                     |             |       |                                                                                                                                                                                                                                                                                                                 |                                                                                                                                                                                                                                                                                                                                                    |                   |
|----|------------|---------------------|-------------|-------|-----------------------------------------------------------------------------------------------------------------------------------------------------------------------------------------------------------------------------------------------------------------------------------------------------------------|----------------------------------------------------------------------------------------------------------------------------------------------------------------------------------------------------------------------------------------------------------------------------------------------------------------------------------------------------|-------------------|
| 32 | rs11203042 | 1.04<br>(1.02-1.06) | T<br>(0.45) | LIPA  | Adipose (subq)<br>Adipose (visceral)<br>Colon (transverse)<br>Heart (atrium)<br>Lung<br>Pancreas<br>Skin (sun exp)<br>Spleen<br>Thyroid<br>Blood                                                                                                                                                                | Adipose (subq)<br>Fibroblasts<br>Lung                                                                                                                                                                                                                                                                                                              | LIPA<br>(intron)  |
| 32 | rs1412444  | 1.07<br>(1.05-1.09) | T<br>(0.37) | LIPA  | Adipose (subq)<br>Adipose (visceral)<br>Adrenal Gland<br>Artery (aorta)<br>Brain (cerebellum)<br>Colon (sigmoid)<br>Colon (transverse)<br>Heart (atrium)<br>Heart (LV)<br>Lung<br>Skeletal Muscle<br>Nerve<br>Pancreas<br>Skin (not sun exp)<br>Skin (sun exposed)<br>Spleen<br>Stomach<br>Thyroid<br>Blood     | Adipose (subq)<br>Adipose (visceral)<br>Adrenal Gland<br>Artery (aorta)<br>Artery (tibial)<br>Brain (spinal cord)<br>Breast<br>Fibroblasts<br>Lymphocytes<br>Lung<br>Tibial Nerve<br>Pancreas<br>Skin (sun exposed)<br>Small Intestine<br>Spleen<br>Stomach<br>Blood                                                                               | LIPA<br>(intron)  |
| 38 | rs9319428  | 1.04<br>(1.02-1.06) | A<br>(0.31) | FLT1  | Nerve (tibial)                                                                                                                                                                                                                                                                                                  |                                                                                                                                                                                                                                                                                                                                                    | FLT1<br>(intron)  |
| 42 | rs17514846 | 1.05<br>(1.03-1.07) | A<br>(0.44) | FES   | Adipose (subq)<br>Adipose (visceral)<br>Adrenal Gland<br>Artery (aorta)<br>Artery (tibial)<br>Fibroblast<br>Colon (transverse)<br>Esophagus (musc.)<br>Heart (atrium)<br>Lung<br>Nerve (tibial)<br>Pancreas<br>Pituitary<br>Prostate<br>Skin (not sun exp)<br>Skin (sun exposed)<br>Stomach<br>Thyroid<br>Blood | Adipose (subq)<br>Adipose (visceral)<br>Artery (aorta)<br>Artery (tibial)<br>Breast<br>Fibroblasts<br>Colon (sigmoid)<br>Esophagus (GEJ)<br>Esophagus (musc.)<br>Heart (atrium)<br>Heart (LV)<br>Lung<br>Salivary Gland<br>Nerve (tibial)<br>Prostate<br>Skin (not sun exp)<br>Skin (sun exposed)<br>Small Intestine<br>Spleen<br>Thyroid<br>Blood | FURIN<br>(intron) |
|    |            |                     |             | FURIN | Artery (aorta)<br>Artery (tibial)<br>Esophagus                                                                                                                                                                                                                                                                  |                                                                                                                                                                                                                                                                                                                                                    |                   |
| 54 | rs7212798  |                     |             | BCAS3 |                                                                                                                                                                                                                                                                                                                 |                                                                                                                                                                                                                                                                                                                                                    | BCAS3<br>(intron) |
| 57 | rs11830157 |                     |             | KSR2  |                                                                                                                                                                                                                                                                                                                 |                                                                                                                                                                                                                                                                                                                                                    | KSR2              |

|                 |           |                     |             |       |                    |                               |
|-----------------|-----------|---------------------|-------------|-------|--------------------|-------------------------------|
| 08 <sup>b</sup> | rs6544713 | 1.05<br>(1.03-1.07) | T<br>(0.32) | ABCG8 | Colon (transverse) | (intron)<br>ABCG8<br>(intron) |
|-----------------|-----------|---------------------|-------------|-------|--------------------|-------------------------------|

244

245 Tissue names in grey font indicate GWAS SNP is associated with a decrease in gene  
246 expression (eQTL) or normalized intron-excision ratio (sQTL), while those in black font are  
247 associated with increased expression/normalized intron-excision ratio.

248

249 <sup>a</sup> values reported from original publication (24) in Han Chinese population. rs6903956 was not  
250 significant in Nikpay et al. (1).

251 <sup>b</sup> ABCG8 and ABCG5 were both annotated by GWAS. ABCG5 was not supported by QTL or  
252 position

253

254

For four of the loci (16-ADTRP, 32-LIPA, 38-FLT1, 42-FURIN, 8-ABCG8), GWAS

255 annotation of candidate gene assignment is supported by both QTL and position. In one

256 instance, locus 42 - rs17514846 (FURIN, FES), more than one gene is annotated by GWAS and

257 supported by our reprioritization. rs17514846, which falls in an intron of FURIN, serves as an

258 eQTL and an sQTL for FES in 23 tissues and an eQTL for FURIN in 3 tissues, two of which

259 (aorta and tibial artery) overlap with FES. In aorta and tibial artery, rs17514846 is associated

260 with decreased expression of FES as opposed to increased expression of FURIN – a possible

261 example of competing interactions between regulatory and promoter regions. Evidence for

262 multiple candidate genes in a locus may represent a paradigm in which a single SNP exerts an

263 impact through more than one gene.

264 In some instances the same variant in the same tissue is associated with both

265 expression and splicing. For example, rs141244 in blood is associated with increased

266 expression of LIPA and decreased splicing, a scenario that is consistent with greater stability of

267 the un-spliced transcript. Thus, in considering potential mechanisms of action for the variant, it

268 is important to evaluate not only the implications of increased levels of LIPA mRNA, but also

269 increased levels of the un-spliced transcript.

270

271 **Tier 2: New candidate genes implicated**

272 Variants in 50 loci are associated with expression of one or more genes or physically  
273 overlap with another gene in addition to all (39 loci), some (7 loci), or none (4 loci) of the genes  
274 annotated by GWAS. Loci where additional candidate genes are introduced are classified as  
275 Tier 2 (S3 File). Candidate genes for these 50 GWAS loci are expanded by an average of 4.3  
276 genes per locus for a total of 170 genes: 116 from eQTL based reprioritization, 17 from sQTL  
277 based reprioritization, 5 from physical position, and 32 from some combination of these features  
278 (S3 Fig).

279 While about a third of the loci (21) have two or fewer candidate genes, others have  
280 substantially more: e.g., locus 33 - rs12413409 and rs11191416 ( CYP17A1-CNNM2-NT5C2)  
281 are associated with expression of twelve genes: ARL3, AS3MT, ATP5MD, BORCS7, CALHM2,  
282 CNNM2, CYP17A1-AS1, MARCKSL1P1, MFSD13A, NT5C2, SFXN2, and WBP1L. Importantly,  
283 these multi-gene eQTLs cannot be explained solely by co-expression between genes. These  
284 eQTLs are often associated with expression of different genes in different tissues and for those  
285 associations in the same tissue the genes are not necessarily co-expressed (25). Possible  
286 mechanisms accounting for these relationships include a co-regulated gene cluster with master  
287 regulator regions affecting all genes in that region (26,27). While we cannot exclude trans-acting  
288 effects, these are typically smaller in size; allelic expression imbalance can serve to distinguish  
289 between *cis* and *trans* effects, but robust RNA allelic ratios are often not available in GTEx.

290 Notably, ncRNAs are candidate genes for 33 of the 58 loci expanded from 6 loci prior to  
291 re-prioritization. For no loci are all candidate genes non-coding. The greatest percent of non-  
292 coding candidate genes (80%) is observed for locus 20 - rs12190287 and rs12202017 (TCF21).  
293 The protein-coding gene TCF21 annotated by GWAS is supported by eQTLs in 24 different  
294 tissues while 4 additional non-coding genes are introduced based on eQTL and sQTL analysis.  
295 The candidate ncRNAs are located within a 500KB region, with TARID being antisense to  
296 TCF21, and like many non-coding genes generally have lower expression levels.

297 For Tier 2C loci, there is no evidence to support the GWAS annotation. For example,  
298 locus 46 - rs1122608 and rs56289821 LDLR is annotated by GWAS, a gene well-recognized for  
299 its role in lipid metabolism; yet, rs1122608 falls within an intron of SMARCA4 and is both an  
300 eQTL and sQTL for SMARCA4 as well as an eQTL for CARM1 and YIPF2 but not LDLR. The  
301 alternative SNP identified by GWAS, rs56289821, also does not point to LDLR but rather  
302 implicates RGL3, SLC44A2, and again SMARCA4. These 4 Tier 2C loci critically require future  
303 work, both mechanistic and computational, to explore relevant gene targets.

304

### 305 **Tier 3: No genes implicated**

306 The remaining GWAS locus, locus 55 - rs663129 (MC4R, PMAIP1), classified as Tier 3,  
307 did not show any association with expression of nearby genes and is not physically overlapping  
308 any transcripts (S3 File). This locus and 3 others (locus 27 - rs2954029 (TRIB1), locus 54 -  
309 rs7212798 (BCAS3), and locus 57 - rs11830157 (KSR2)) that are without any eQTL  
310 associations may have more subtle or context-dependent effects on gene expression that  
311 remain undetectable in GTEx. In particular, non-polyadenylated transcripts are not in GTEx as  
312 poly-dT priming was used, leaving countless ncRNAs as additional candidates. Furthermore,  
313 these SNPs may affect gene expression in *trans* (although we do not find such evidence in the  
314 GTEx *trans*-eQTL dataset) or exert their effect without altering RNA levels measured by  
315 RNAseq (e.g. by controlling the chromatin structure or co-translationally alter RNA  
316 modifications). Additionally, variants affecting RNA functions and processing (structural RNA  
317 SNPs) (8,28), may not be visible as eQTLs, or they may selectively affect translation by  
318 changing polysomal loading (29).

319 Given GWAS variants are expected to mark functional variants rather than themselves  
320 being functional, we test SNPs within a 1MB window in LD ( $R^2 > 0.8$ ) with each of the 4 GWAS  
321 variants lacking annotations, expanding the number of SNPs to 200. Using this approach, we

322 find significant eQTLs, but no significant sQTLs, for three of the four loci. For locus 57, we were  
323 unable to find additional candidate SNPs with an  $R^2 > 0.8$  to mark the haplotype.

324 For locus 55, without any candidate genes identified by our original re-prioritization,  
325 eighteen variants (mean  $R^2$  0.95 with the GWAS variant rs663129) are eQTLs in testis for  
326 MC4R, also annotated by GWAS. Seven of these variants have an  $R^2$  of 1 with the GWAS  
327 variant. Five of these 18 SNPs fall within a non-coding RNA (AC090771.2) approximately 200kb  
328 downstream of MC4R.

329 For locus 27, two variants (rs10808546 and rs2954031 with  $R^2$  of 0.87 and 0.91 with the  
330 GWAS variant rs2954029) are eQTLs in lung for a non-coding RNA (AC100858.3) almost 400kb  
331 downstream and on the opposite strand to TRIB1. These two SNPs and 15 others in high LD  
332 with the GWAS variant fall within an intron of a different non-coding RNA (AC091114.1), located  
333 immediately upstream of TRIB1.

334 For locus 54, we find 83 variants (mean  $R^2$  0.96 with the GWAS variant rs7212798) are  
335 eQTLs in tibial artery and nerve for genes BCAS3, AC005884.1, and RP11-136H19.1. Five of  
336 these variants with an  $R^2$  of 1 with the GWAS variant serve as eQTLs for AC005884.1 in tibial  
337 nerve, and are physically located within BCAS3, the protein-coding gene that has been  
338 annotated by GWAS. A different five variants are eQTLs for BCAS3; they are identified in tibial  
339 artery and have a mean  $R^2$  with the GWAS variant of 0.81. Such long-range high LD values  
340 imply evolutionarily conserved LD blocks with biological selectable functions.

341 Thus, by expanding the candidate SNP list to include other variants in strong LD with  
342 that identified by GWAS over long genomic distances, we find additional candidate genes  
343 supported by eQTL and physical position.

344

## 345 **Survey of CAD GWAS loci**

346           The genomic loci for each these 245 candidate genes often harbor multiple protein-  
347 coding and non-coding transcripts arranged on both the sense and antisense strands (S2 File).  
348 They express an average of 9 transcripts per gene and a maximum of 189 (TEX41- locus 10 -  
349 rs2252641, rs17678683), with 47% of all transcripts being non-coding (Fig 1B). More than half  
350 of the gene loci (161) also contain one or more antisense genes (i.e., located on the opposite  
351 strand and overlapping).

352           Using GTEx data, we find RNA expression is associated with one or more genetic  
353 variant in the locus with a median of 4 eQTLs (max 32230) among 50% of the 245 candidate  
354 genes in 48 different tissues (Fig 1B).

355           With a median of 26 publications and a maximum of 27,497 (APOE), only a handful of  
356 these 245 candidate genes have been well studied to date (Fig 1B). Twenty percent (51) of  
357 genes do not have a single paper indexed in PubMed. There are on average 20 gene ontology  
358 (GO) terms, which are manually curated based on the literature, assigned to each gene;  
359 however, 62 (25%) of the candidate genes have no associated GO terms. We find those genes  
360 without GO terms and with limited publications do not have fewer markers of functionality  
361 (eQTLs, splicing QTLs, etc.), but are almost exclusively non-coding, indicative of a recognized  
362 bias in the literature toward protein-coding genes (Fig 1).

363           Each implicated locus displays an astoundingly complex architecture with multiple  
364 candidate genes implicated by RNA expression and physical location, each with a number of  
365 overlapping coding and non-coding transcripts including those in antisense orientation. The  
366 complexity of these loci emphasizes the need for targeted molecular studies and computational  
367 approaches to determine the relevant gene and transcript(s). The distribution of PubMed  
368 articles and GO ids across candidate genes suggests that this targeted work has touched on  
369 only a handful of genes thus far, with more recent studies beginning to focus on 'neglected'  
370 CAD candidate genes (30).

371



## 372 **Allelic RNA expression imbalance reveals functional** 373 **variation**

374 To evaluate potential functionality for each of the 58 GWAS loci, we ask whether each  
375 candidate SNP is associated with allelic expression imbalance (AEI), a specific indicator of *cis*-  
376 acting regulatory variation. Whereas comparing expression of the two alleles at a heterozygous  
377 variant, various external/*trans*-acting influences on gene expression are shared and the *cis*-  
378 acting effect of the heterozygous variant can be isolated. In the absence of a functional variant  
379 altering RNA expression, the anticipated distribution between the alleles is 0.5 (ratio=1)(8,31).

380 Using data released by GTEx, we evaluate AEI at each of 104 candidate variants across  
381 54 tissue types. Only 55 of the SNPs are represented in the data. The remainder likely are in  
382 intergenic regions and poorly captured by RNA sequencing, while obtaining accurate AEI ratios  
383 requires rather robust expression (>30 RPM)(32). Of the 55, many are present in only a few  
384 samples making it difficult to infer differential expression. However, several SNPs show  
385 surprisingly robust data – thousands of samples and counts for each allele in the dozens-  
386 hundreds. A majority of these SNPs fail to reveal allelic expression imbalance, with near normal  
387 distribution of deviation from the expected ratio, suggesting no correlation between the GWAS  
388 variant and allelic expression imbalance. This implies that the GWAS candidate SNPs  
389 represented in the data are actually relatively poor markers for functional *cis*-acting variants in  
390 the locus; however, splicing events generating RNA isoforms with similar turnover are one  
391 example where allelic expression imbalance would fail.

392 A number of SNPs do display consistent allelic expression imbalance (Fig 2). Locus 3 –  
393 rs7528419 (SORT1), which falls in the 3'UTR of CELSR2 exhibits AEI in 53/57 liver samples.  
394 Overall low expression of CELSR2 in liver tissue, however means that these ratios are for the  
395 most part based on low coverage (median total count 13). Despite the relative consistency from  
396 sample to sample, large allelic ratios derived from relatively low counts, as observed here,

397 raises suspicion for systemic sources of bias, e.g. preferential amplification of one allele. To  
398 evaluate this further, we considered allelic ratios at nearby SNPs in strong LD ( $R^2 > 0.9$ ) and  
399 weak LD ( $R^2 < 0.1$ ). As these SNPs are co-located, systemic sources of bias should affect all  
400 SNPs in the locus while 'true' biological AEI would be expected only for those variants in strong  
401 LD with a functional SNP. We observe AEI for those SNPs in strong LD with the GWAS marker,  
402 but not for those in the same region in weak LD, a pattern that is suggestive of 'true' biological  
403 AEI and a functional cis-acting variant.

404

405 **Fig 2. Allelic expression imbalance at GWAS variants mark functional SNPs.**

406 Deviation in the observed from the expected ratio for individuals heterozygous for given GWAS  
407 variant. (A) Locus 3 – rs7528419 (SORT1) exhibits AEI in 53/57 liver samples. Subcutaneous  
408 adipose, also shown, demonstrates near normal distribution of deviation from the expected  
409 allelic ratio and is representative of the 46 other tissues with at least 5 samples. (B) Locus 14 -  
410 rs72689147 (GUCY1A3) exhibits AEI in 114/121 samples across 10 different tissues.

411

412 Importantly, even one sample without AEI suggests the variant might itself not be  
413 functional but rather in high LD with a functional variant and serving as a marker. With only a  
414 few samples not exhibiting AEI, rs7528419 can be considered an excellent marker in tight LD  
415 with the functional SNP. Furthermore, that this pattern is only found in liver suggests that the  
416 regulatory variant is tissue specific. In contrast, the bidirectional ratios observed in adipose  
417 tissue suggests that either the marker SNP is in low LD with a functional variant, or low  
418 expression is leading to ratio deviations from unity in a random fashion. The counts in adipose  
419 are relatively low (median total count 11), however it is not substantially different from liver with  
420 a median count of 13.

421 The Locus 14 SNP rs72689147 (*GUCY1A3*), which falls within an intron of *GUCY1A3*,  
422 exhibits AEI in 114/121 samples across 10 different tissues. Again, this SNP does not appear to

423 be functional as not all samples display AEI, but it is a robust marker. While located in an intron,  
424 expression is sufficient to extract allelic ratios; as these are consistently below unity, this results  
425 suggests a gain of function.

426

## 427 **Resolving number of signals in a locus using LD**

428 Focusing on the 7 loci where eQTL-based reprioritization pointed to a single gene as  
429 well as the two examples of AEI discussed above, we find dozens of other significant eQTLs for  
430 each gene. To determine whether these eQTLs represent one or more functional variants, we  
431 plot the effect size (beta) of the variant on RNA expression for each eQTL against its LD ( $R^2$ )  
432 with the top scoring (most significant p-value) eQTL in each tissue where eQTLs are detectable.  
433 Assuming one functional variant in the locus, the beta for each eQTL should correlate with its  $R^2$   
434 relative to the highest scoring SNP (33).

435 This approach reveals that the observed eQTLs for a gene often represent more than  
436 one regulatory variant, with the exception of FLT1 in Tibial Nerve – represented by only one  
437 cluster of variants marked by the GWAS SNP (Fig 3). This result is critical to the correct  
438 interpretation of GWAS that would otherwise rely on a single variant rather than considering the  
439 combined effect of more than one causative variant.

440

441 **Fig 3. Number of eQTL signals.** Correlation plots show absolute value of beta for  
442 variant effects on RNA expression versus  $R^2$  with the top eQTL (most significant p-value),  
443 including all significant eQTLs in the given gene-tissue combination. Blue dots represent the top  
444 eQTL (most significant p-value), red dots represent GWAS variant(s). (A) FLT1 in Tibial Nerve:  
445 eQTLs are accounted for by a single eQTL marked by the GWAS variant (all eQTLs display a  
446 linear correlation with  $R^2$ ). CELSR2 (liver), GUCY1A3 (tibial artery), and LIPA (blood),  
447 correlation between beta and  $R^2$  suggests multiple functional variants. (B) At least three distinct

448 LD blocks represented by LIPA eQTLs in whole blood. Correlations are shown left to right  
 449 between the absolute value of beta and  $R^2$  with rs142444 (GWAS SNP), rs1051338, or  
 450 rs2250781. Tightly linked SNPs ( $D' > 0.9$ ;  $R^2 > 0.9$ ) are shown in the same color.

451  
 452 As an example, we consider the number of distinct eQTLs needed to maximally account  
 453 for LIPA expression in blood. The most significant eQTL consists of a group of SNPs in high LD  
 454 marked by the GWAS variant (red dot in Fig 3), while two additional clusters of SNPs (marked  
 455 by rs1051338 and rs2250781) have equally or even more robust beta and p-values but show  
 456 relatively poor linkage with the GWAS cluster ( $R^2 \sim 0.5$ ) (Fig 3B). These SNPs are more  
 457 significant eQTLs than predicted by their LD with the trait-associated variant and may mark  
 458 additional functional variants in the locus. To test the significance of any additional regulatory  
 459 variants, we used a separate dataset (CATHGEN) to evaluate whether including an additional  
 460 marker variant in a regression model improves the ability to account for LIPA expression in  
 461 blood. Including additional markers improved the eQTL model, while adding a marker in strong  
 462 LD with the original variant did not (Table 2), indicating there are likely multiple functional  
 463 variants, incompletely represented by the GWAS variant alone, that contribute to LIPA  
 464 expression in blood.

465

466 **Table 2. Assessing multiple regulatory variants for LIPA**

| Variable of interest               | ANOVA p-value | Model 1                    | Model 2                                 |
|------------------------------------|---------------|----------------------------|-----------------------------------------|
| rs1412444                          | 8.8e-16       | XP ~ sex + age             | XP ~ rs1412444 + sex + age              |
| rs13332328                         | 8.8e-16       | XP ~ sex + age             | XP ~ rs13332328 + sex + age             |
| rs1051338                          | 8.8e-16       | XP ~ sex + age             | XP ~ rs1051338 + sex + age              |
| rs2250781                          | 8.8e-16       | XP ~ sex + age             | XP ~ rs2250781 + sex + age              |
| rs1412444 in context of rs13332328 | 1.0           | XP ~ rs1412444 + sex + age | XP ~ rs1412444 + rs13332328 + sex + age |

|                                                          |      |                                         |                                                     |
|----------------------------------------------------------|------|-----------------------------------------|-----------------------------------------------------|
| <i>rs1412444 in context of rs1051338</i>                 | 0.23 | XP ~ rs1412444 + sex + age              | XP ~ rs1412444 + rs1051338 + sex + age              |
| <i>rs1412444 in context of rs2250781</i>                 | 0.04 | XP ~ rs1412444 + sex + age              | XP ~ rs1412444 + rs2250781 + sex + age              |
| <i>rs1412444 &amp; rs2250781 in context of rs1051338</i> | 0.19 | XP ~ rs1412444 + rs2250781 + sex + age  | XP ~ rs1412444 + rs2250781 + rs1051338 + sex + age  |
| <i>rs1412444 &amp; rs1051338 in context of rs2250781</i> | 0.04 | XP ~ rs1412444 + rs1051338 + sex + age  | XP ~ rs1412444 + rs1051338 + rs2250781 + sex + age  |
| <i>rs1412444</i>                                         | 1e-3 | MI ~ covariates                         | MI ~ rs1412444 + covariates                         |
| <i>rs13332328</i>                                        | 1e-3 | MI ~ covariates                         | MI ~ rs13332328 + covariates                        |
| <i>rs1051338</i>                                         | 6e-4 | MI ~ covariates                         | MI ~ rs1051338 + covariates                         |
| <i>rs2250781</i>                                         | 4e-4 | MI ~ covariates                         | MI ~ rs2250781 + covariates                         |
| <i>rs1412444 in context of rs13332328</i>                | 0.79 | MI ~ rs1412444 + covariates             | MI ~ rs1412444 + rs13332328 + covariates            |
| <i>rs1412444 in context of rs1051338</i>                 | 0.36 | MI ~ rs1412444 + covariates             | MI ~ rs1412444 + rs1051338 + covariates             |
| <i>rs1412444 in context of rs2250781</i>                 | 0.56 | MI ~ rs1412444 + covariates             | MI ~ rs1412444 + rs2250781 + covariates             |
| <i>rs1412444 &amp; rs2250781 in context of rs1051338</i> | 0.11 | MI ~ rs1412444 + rs2250781 + covariates | MI ~ rs1412444 + rs2250781 + rs1051338 + covariates |
| <i>rs1412444 &amp; rs1051338 in context of rs2250781</i> | 0.17 | MI ~ rs1412444 + rs1051338 + covariates | MI ~ rs1412444 + rs1051338 + rs2250781 + covariates |

467

468 ANOVA comparing ability of models with different SNP combinations to account for LIPA  
 469 expression and MI. Covariates in CATHGEN include sex, age, hypercholesterolemia, smoking,  
 470 and number of diseased vessels.  
 471

472 Testing these additional variants with MI instead of LIPA expression did not yield  
 473 significant associations (Table 2). However, LIPA expression itself is not associated with MI  
 474 except when rs1412444 is homozygous minor, which may explain the discrepancy. In looking  
 475 separately at the associations between the GWAS hit and LIPA expression and the GWAS hit  
 476 and MI, we find that rs1412444 is associated with increased risk of MI and increased expression  
 477 of LIPA, but counterintuitively those with two minor alleles and MI exhibit lower rather than

478 higher expression, a pattern that also holds in GTEx although it is only statistically significant in  
479 CATHGEN (Fig 4, S4 Figure).

480

481 **Fig 4. LIPA expression, MI, and genotype.** Comparison of LIPA expression in  
482 CATHGEN for those with and without MI based on rs142444 genotype. LIPA exhibits higher  
483 expression only in those without MI in the homozygous minor group (p-value = 0.02).

484

## 485 **Context – Tissue & Transcript specific eQTLs**

486 Genetic variation exists and functions within a context – the surrounding sequence, the  
487 tissue type and its preferred transcription factors, etc. In an effort to resolve the functional  
488 variation behind statistical associations observed in GWAS, it is essential to consider these  
489 contexts. As highlighted by the tissue specific AEI patterns above, if these relationships are not  
490 considered in a context specific manner (*e.g.*, on a tissue by tissue basis), many robust effects  
491 will remain hidden. In an effort to evaluate some of these contextual features, we consider  
492 tissue and transcript specific eQTLs.

493 eQTL analysis may focus the search on a relevant tissue. However, eQTLs are  
494 detectable only where expression and sample size are sufficiently high; accordingly tissue-  
495 specific differences in eQTLs reflect overall patterns of tissue selective expression and sample  
496 size, in addition to the influence of genetic variation.

497 To consider how eQTLs for a given gene compare across different tissues, we cluster  
498 genome-wide significant eQTLs reported by GTEx for LIPA in a heatmap organized by their  
499 pairwise LD ( $R^2$ ), using a colored bar at the top of the heatmap to denote tissue type (Fig. 5A).  
500 eQTL SNPs generally cluster by tissue, suggesting distinct regulatory variants in different  
501 tissues. However, there are two LD blocks that contain eQTLs in more than half of tissues  
502 indicative of genetic variation that acts across different tissue types. Variants detected by

503 GWAS for LIPA appear as a significant eQTLs in a subset of tissues (Table 1), some of which fit  
504 with our understanding of CAD pathology (heart, aorta, adipose), others suggest as yet  
505 unexplained biological consequences (spleen, pancreas).

506

507 **Fig 5. Tissue and transcript specific eQTLs for LIPA.** (A) Heatmap of LD for those  
508 SNPs reported by GTEx as genome-wide significant eQTLs for LIPA. Lighter-colored squares in  
509 the heatmap represent LD blocks, with SNPs clustered by  $R^2$  and not by genomic position.  
510 Colored bars at top eQTLs in each tissue with more significant p-values denoted by darker  
511 color. (B) Local Manhattan plot for *LIPA* in blood. Position is denoted on the x-axis; black bar  
512 indicates gene start and stop. Negative log(p-value) for association with RNA expression is  
513 denoted on the y-axis. Each transcript and the gene overall are marked by a different color (see  
514 legend). Inset zooms in on the regions carrying rs1412444, rs1051338, rs2250781 identified as  
515 distinct top scoring eQTLs each contributing to *LIPA* gene expression (see Fig 3).

516

517 To consider transcript-specific eQTLs more specifically, for 1mb upstream and  
518 downstream of LIPA, we calculated the association between each SNP and expression of both  
519 overall mRNA and individual isoforms. The resulting local Manhattan plot displays the  
520 association p-values for LIPA transcripts in blood (Fig 4B). Five transcripts with no expression  
521 (zero-values) in 90% or more of individuals were excluded (ENST00000428800,  
522 ENST00000282673, ENST00000487618, ENST00000463623, ENST00000489359). Whereas  
523 the overall eQTL patterns are similar between the gene and individual transcripts, divergent  
524 SNPs indicate the presence of transcript-specific eQTLs. Remarkably, robust eQTLs distribute  
525 over the entire 2 MB region, with the most distant eQTLs associated with individual transcripts  
526 rather than overall gene expression. The most significant eQTLs form a peak of multiple SNPs  
527 close to the transcribed region, topped by an eQTL for the gene level summary of expression

528 (ENSG00000107798) rather than any specific isoform. Tissue selectivity and functionality of  
529 each transcript requires separate studies.

530

## 531 **Conclusions**

532 We consider each of 58 loci implicated in CAD by GWAS to better understand the  
533 biological meaning of the underlying statistical associations. In evaluating each of these loci, we  
534 find numerous candidate genes that were not included in the original annotation by GWAS.  
535 Many of these are non-coding. Non-coding RNAs, now well-recognized for their role as  
536 regulators, have historically been dismissed and continue to be difficult to study, a trend that is  
537 apparent in their poor representation in the literature, among GO annotations, and as annotated  
538 by GWAS (26). We find no evidence to suggest these non-coding RNAs are less likely to  
539 account for the observed associations in GWAS and would advocate for their inclusion in further  
540 mechanistic and computational work examining these loci. In addition to broadening candidate  
541 gene lists to include non-coding transcripts, we would urge reconsideration of current  
542 assignments, especially for those loci categorized as Tier2C where expression, splicing, and  
543 physical position do not support the gene annotated by GWAS. LDLR is a particularly prominent  
544 example. Given our understanding of the critical role lipid metabolism plays in CAD, it is  
545 counterintuitive not to assign a CAD GWAS variant to LDLR when it lies within 15kb of the  
546 *LDLR* locus (34). However, RNA expression and splicing data do not support this annotation,  
547 instead supporting the notion that such genetic variation affects the function of other nearby  
548 genes including SMARCA4, CARM1, YIPF2, RGL3, SLC44A2 (29).

549 Using allelic ratios built from tissue-specific RNA sequencing data available through GTEx,  
550 we were able to identify two loci where the GWAS variant served as a robust marker for a  
551 functional *cis*-acting regulatory variant. Locus 3 – rs7528419 (SORT1) falls in the 3'UTR of  
552 CELSR2, exhibits AEI exclusively in liver, and is in nearly perfect LD with rs12740374 which



553 was shown by Musunuru et al. through a series of molecular experiments to create a C/EBP  
554 binding site increasing expression of SORT1, a multiligand sorting receptor which they  
555 concomitantly showed to be associated with LDL-C and VLDL levels (35). This work revealed a  
556 single functional variant for a single target gene with a substantial effect size, the authors  
557 estimated a ~40% difference in MI risk. Our work suggests additional eQTLs not explained by  
558 their LD with the LD block marked by GWAS variant rs7528419. As we begin to identify  
559 functional variation behind GWAS associations, an important next step will be resolving  
560 additional functional variants within the loci that may modify these associations and better  
561 account for disease risk (36).

562 This work emphasizes that the linear presentation of GWAS results as a single variant tied  
563 to a single gene fails to capture the complexity of these loci. Many loci contain several SNPs  
564 identified by GWAS, and for each of these, multiple candidate genes are implicated by RNA  
565 expression and splicing associations as well as physical proximity. LD alone rarely accounts for  
566 the observed eQTLs, suggesting multiple functional variants within these loci. Extending the  
567 search for functional variants implicated by GWAS over a larger genomic region (1 Mb) can  
568 further reveal novel candidate loci. Although some GWAS associations may ultimately implicate  
569 single variants that alter expression of individual genes, this work indicates that true genetic  
570 effect size of a gene locus is accounted for by a multi-factorial system that allows for multiple  
571 functional variants regulating one or more genes. The approach presented here must be  
572 expanded to include functional variants that are undetectable by RNAseq of whole tissues,  
573 including cell type specific expression, effect on RNA-protein interactions, distribution in sub-  
574 cellular domains, alteration of translational processes, and of course variants that change  
575 protein functions.

576

## 577 **Acknowledgements**

578 This study was supported by National Institutes of Health National Institute of General  
579 Medical Science Pharmacogenetics Research Network [Grant U01 GM092655] and the  
580 National Center for Advancing Translational Sciences [TL1 TR001069].

581 The GTEx Project was supported by the Common Fund of the Office of the Director of  
582 the National Institutes of Health, and by NCI, NHGRI, NHLBI, NIDA, NIMH, and NINDS. The  
583 data used for the analyses described in this manuscript were obtained from: the GTEx Portal  
584 and dbGaP accession number phs000424.

585 For CATHGEN, clinical data originated from the Duke Databank for Cardiovascular  
586 Disease (DDCD) and biological samples originated from the Duke Cardiac CATHeterization  
587 (CATHGEN) study. Funding support for the Genetic Mediators of Metabolic CVD Risk was  
588 provided by NHLBI grant RC2 HL101621 (William E. Kraus). The data used for the analyses  
589 described in this manuscript were obtained from the dbGaP accession number  
590 phs0000703.v1.p1.

591 Computing time provided by the Ohio Supercomputer Center, GRANT #: PAS0885-2  
592 and the Prometheus Cyfronet AGH.

593

## 594 **References**

- 595 1. Nikpay M, Goel A, Won H-H, Hall LM, Willenborg C, Kanoni S, et al. A comprehensive  
596 1000 Genomes–based genome-wide association meta-analysis of coronary artery  
597 disease. *Nat Genet* [Internet]. 2015 Sep 7 [cited 2016 Jun 28];47(10):1121–30. Available  
598 from: <http://www.nature.com/doi/10.1038/ng.3396>
- 599 2. Inouye M, Abraham G, Nelson CP, Wood AM, Sweeting MJ, Dudbridge F, et al. Genomic  
600 Risk Prediction of Coronary Artery Disease in 480,000 Adults: Implications for Primary  
601 Prevention. *J Am Coll Cardiol* [Internet]. 2018 Oct 16 [cited 2020 Oct 22];72(16):1883–93.  
602 Available from: <https://doi.org/10.1016/j.jacc.2018.07.079>

- 603 3. Musunuru K, Kathiresan S. Genetics of Common, Complex Coronary Artery Disease. Vol.  
604 177, Cell. Cell Press; 2019. p. 132–45.
- 605 4. Nurnberg ST, Zhang H, Hand NJ, Bauer RC, Saleheen D, Reilly MP, et al. From Loci to  
606 Biology. *Circ Res* [Internet]. 2016 Feb 19 [cited 2017 Jul 1];118(4):586–606. Available  
607 from: <http://www.ncbi.nlm.nih.gov/pubmed/26892960>
- 608 5. Hindorff LA, Sethupathy P, Junkins HA, Ramos EM, Mehta JP, Collins FS, et al. Potential  
609 etiologic and functional implications of genome-wide association loci for human diseases  
610 and traits. *Proc Natl Acad Sci U S A*. 2009;106:9362–7.
- 611 6. Smemo S, Tena JJ, Kim K-H, Gamazon ER, Sakabe NJ, Gómez-Marín C, et al. Obesity-  
612 associated variants within FTO form long-range functional connections with IRX3. *Nature*  
613 [Internet]. 2014 Mar 20 [cited 2015 Jun 29];507(7492):371–5. Available from:  
614 <http://dx.doi.org/10.1038/nature13138>
- 615 7. Won HH, Natarajan P, Dobbyn A, Jordan DM, Roussos P, Lage K, et al. Disproportionate  
616 Contributions of Select Genomic Compartments and Cell Types to Genetic Risk for  
617 Coronary Artery Disease. Snyder M, editor. *PLoS Genet* [Internet]. 2015 Oct 28 [cited  
618 2016 Jun 28];11(10):e1005622. Available from:  
619 <http://dx.plos.org/10.1371/journal.pgen.1005622>
- 620 8. Johnson AD, Zhang Y, Papp AC, Pinsonneault JK, Lim J-E, Saffen D, et al.  
621 Polymorphisms affecting gene transcription and mRNA processing in pharmacogenetic  
622 candidate genes: detection through allelic expression imbalance in human target tissues.  
623 *Pharmacogenet Genomics* [Internet]. 2008 Sep [cited 2016 Jul 15];18(9):781–91.  
624 Available from: <http://www.ncbi.nlm.nih.gov/pubmed/18698231>
- 625 9. Barrie ES, Hartmann K, Lee S-H, Frater JT, Seweryn M, Wang D, et al. The  
626 CHRNA5/CHRNA3/CHRNA4 Nicotinic Receptor Regulome: Genomic Architecture,  
627 Regulatory Variants, and Clinical Associations. *Hum Mutat* [Internet]. 2016 Nov [cited  
628 2016 Dec 9]; Available from: <http://doi.wiley.com/10.1002/humu.23135>

- 629 10. Halley P, Kadakkuzha BM, Faghihi MA, Magistri M, Zeier Z, Khorkova O, et al.  
630 Regulation of the apolipoprotein gene cluster by a long noncoding RNA. *Cell Rep*  
631 [Internet]. 2014 Jan 16 [cited 2015 Jan 16];6(1):222–30. Available from:  
632 [http://www.pubmedcentral.nih.gov/articlerender.fcgi?artid=3924898&tool=pmcentrez&ren](http://www.pubmedcentral.nih.gov/articlerender.fcgi?artid=3924898&tool=pmcentrez&rendertype=abstract)  
633 [dertype=abstract](http://www.pubmedcentral.nih.gov/articlerender.fcgi?artid=3924898&tool=pmcentrez&rendertype=abstract)
- 634 11. Tada H, Won HH, Melander O, Yang J, Peloso GM, Kathiresan S. Multiple associated  
635 variants increase the heritability explained for plasma lipids and coronary artery disease.  
636 *Circ Cardiovasc Genet* [Internet]. 2014 Oct 1 [cited 2016 Jun 28];7(5):583–7. Available  
637 from: <http://circgenetics.ahajournals.org/cgi/doi/10.1161/CIRCGENETICS.113.000420>
- 638 12. Wang D, Hartmann K, Seweryn M, Sadee W. Interactions Between Regulatory Variants  
639 in CYP7A1 (Cholesterol 7 $\alpha$ -Hydroxylase) Promoter and Enhancer Regions Regulate  
640 CYP7A1 Expression. *Circ Genomic Precis Med* [Internet]. 2018 [cited 2020 Jul  
641 12];11(10):e002082. Available from: <http://www.ncbi.nlm.nih.gov/pubmed/30354296>
- 642 13. Lippert C, Listgarten J, Davidson RI, Baxter S, Poon H, Poong H, et al. An exhaustive  
643 epistatic SNP association analysis on expanded Wellcome Trust data. *Sci Rep* [Internet].  
644 2013 Jan [cited 2015 Jan 12];3:1099. Available from:  
645 [http://www.pubmedcentral.nih.gov/articlerender.fcgi?artid=3551227&tool=pmcentrez&ren](http://www.pubmedcentral.nih.gov/articlerender.fcgi?artid=3551227&tool=pmcentrez&rendertype=abstract)  
646 [dertype=abstract](http://www.pubmedcentral.nih.gov/articlerender.fcgi?artid=3551227&tool=pmcentrez&rendertype=abstract)
- 647 14. Hemani G, Knott S, Haley C, Li Z, Wang S. An Evolutionary Perspective on Epistasis and  
648 the Missing Heritability. Mackay TFC, editor. *PLoS Genet* [Internet]. 2013 Feb 28 [cited  
649 2017 Aug 8];9(2):e1003295. Available from:  
650 <http://dx.plos.org/10.1371/journal.pgen.1003295>
- 651 15. Hartmann K, Seweryn M, Handleman SK, Rempala GA, Sadee W. Non-linear  
652 interactions between candidate genes of myocardial infarction revealed in mRNA  
653 expression profiles. *BMC Genomics* [Internet]. 2016 [cited 2016 Oct 12];17(1):738.  
654 Available from: <http://www.ncbi.nlm.nih.gov/pubmed/27640124>

- 655 16. Skwark MJ, Croucher NJ, Puranen S, Chewapreecha C, Pesonen M, Xu YY, et al.  
656 Interacting networks of resistance, virulence and core machinery genes identified by  
657 genome-wide epistasis analysis. Gojobori T, editor. PLOS Genet [Internet]. 2017 Feb 16  
658 [cited 2020 Oct 22];13(2):e1006508. Available from:  
659 <https://dx.plos.org/10.1371/journal.pgen.1006508>
- 660 17. Nie SF, Zha LF, Fan Q, Liao YH, Zhang HS, Chen QW, et al. Genetic regulation of the  
661 thymic stromal lymphopoietin (TSLP)/TSLP receptor (TSLPR) gene expression and  
662 influence of epistatic interactions between IL-33 and the TSLP/TSLPR axis on risk of  
663 coronary artery disease. Front Immunol [Internet]. 2018 Aug 3 [cited 2020 Oct  
664 22];9(AUG):3. Available from: [/pmc/articles/PMC6085432/?report=abstract](https://pubmed.ncbi.nlm.nih.gov/30111111/)
- 665 18. Rio S, Mary-Huard T, Moreau L, Bauland C, Palaffre C, Madur D, et al. Disentangling  
666 group specific QTL allele effects from genetic background epistasis using admixed  
667 individuals in GWAS: An application to maize flowering. Springer NM, editor. PLOS  
668 Genet [Internet]. 2020 Mar 4 [cited 2020 Oct 22];16(3):e1008241. Available from:  
669 <https://dx.plos.org/10.1371/journal.pgen.1008241>
- 670 19. Wallace C, Rotival M, Cooper JD, Rice CM, Yang JHM, McNeill M, et al. Statistical  
671 colocalization of monocyte gene expression and genetic risk variants for type 1 diabetes.  
672 Hum Mol Genet [Internet]. 2012 Jun 15 [cited 2020 Oct 22];21(12):2815–24. Available  
673 from: <http://cran.r-project.org>
- 674 20. Giambartolomei C, Vukcevic D, Schadt EE, Franke L, Hingorani AD, Wallace C, et al.  
675 Bayesian Test for Colocalisation between Pairs of Genetic Association Studies Using  
676 Summary Statistics. Williams SM, editor. PLoS Genet [Internet]. 2014 May 15 [cited 2020  
677 Oct 22];10(5):e1004383. Available from:  
678 <https://dx.plos.org/10.1371/journal.pgen.1004383>
- 679 21. Hormozdiari F, van de Bunt M, Segrè A V., Li X, Joo JWJ, Bilow M, et al. Colocalization  
680 of GWAS and eQTL Signals Detects Target Genes. Am J Hum Genet. 2016 Dec

- 681 1;99(6):1245–60.
- 682 22. Lonsdale J, Thomas J, Salvatore M, Phillips R, Lo E, Shad S, et al. The Genotype-Tissue  
683 Expression (GTEx) project. *Nat Genet* [Internet]. 2013 Jun [cited 2014 Jul 10];45(6):580–  
684 5. Available from: <http://dx.doi.org/10.1038/ng.2653>
- 685 23. C G, J ZL, W Z, M H, H S, J B, et al. A Bayesian Framework for Multiple Trait  
686 Colocalization From Summary Association Statistics. *Bioinformatics* [Internet]. 2018 [cited  
687 2020 Jun 12];34(15). Available from:  
688 [https://pubmed.ncbi.nlm.nih.gov/29579179/?from\\_term=COLOC&from\\_pos=2](https://pubmed.ncbi.nlm.nih.gov/29579179/?from_term=COLOC&from_pos=2)
- 689 24. F W, CQ X, Q H, JP C, XC L, D W, et al. Genome-wide Association Identifies a  
690 Susceptibility Locus for Coronary Artery Disease in the Chinese Han Population. *Nat*  
691 *Genet* [Internet]. 2011 [cited 2020 Jun 12];43(4). Available from:  
692 <https://pubmed.ncbi.nlm.nih.gov/21378986/>
- 693 25. Wainberg M, Sinnott-Armstrong N, Mancuso N, Barbeira AN, Knowles DA, Golan D, et al.  
694 Opportunities and challenges for transcriptome-wide association studies. *Nat Genet*.  
695 2019;51(4).
- 696 26. Mongelli A, Martelli F, Farsetti A, Gaetano C. The dark that matters: Long noncoding  
697 RNAs as master regulators of cellular metabolism in noncommunicable diseases  
698 [Internet]. Vol. 10, *Frontiers in Physiology*. Frontiers Media S.A.; 2019 [cited 2020 Oct  
699 22]. p. 369. Available from: [www.frontiersin.org](http://www.frontiersin.org)
- 700 27. Lee DP, Tan WLW, Anene-Nzelu CG, Lee CJM, Li PY, Luu TDA, et al. Robust CTCF-  
701 Based Chromatin Architecture Underpins Epigenetic Changes in the Heart Failure  
702 Stress–Gene Response. *Circulation* [Internet]. 2019 Apr 16 [cited 2020 Oct  
703 22];139(16):1937–56. Available from:  
704 <https://www.ahajournals.org/doi/10.1161/CIRCULATIONAHA.118.036726>
- 705 28. Sadee W, Hartmann K, Seweryn M, Pietrzak M, Handelman SK, Rempala GA. Missing  
706 heritability of common diseases and treatments outside the protein-coding exome. *Hum*

- 707 Genet [Internet]. 2014 Oct [cited 2015 Jan 16];133(10):1199–215. Available from:  
708 <http://www.ncbi.nlm.nih.gov/pubmed/25107510>
- 709 29. Mascarenhas R, Pietrzak M, Smith RM, Webb A, Wang D, Papp AC, et al. Allele-  
710 Selective Transcriptome Recruitment to Polysomes Primed for Translation: Protein-  
711 Coding and Noncoding RNAs, and RNA Isoforms. PLoS One [Internet]. 2015 Jan 2 [cited  
712 2016 Feb 6];10(9):e0136798. Available from:  
713 <http://journals.plos.org/plosone/article?id=10.1371/journal.pone.0136798>
- 714 30. Jones PD, Webb TR. From GWAS to new biology and treatments in CAD. Aging (Albany  
715 NY) [Internet]. 2019 [cited 2020 Jun 12];11(6):1611. Available from:  
716 <https://www.ncbi.nlm.nih.gov/pmc/articles/PMC6461175/>
- 717 31. Lu R, Smith RM, Seweryn M, Wang D, Hartmann K, Webb A, et al. Analyzing allele  
718 specific RNA expression using mixture models. BMC Genomics [Internet]. 2015 Jan 1  
719 [cited 2016 Jan 29];16(1):566. Available from:  
720 <http://bmcbgenomics.biomedcentral.com/articles/10.1186/s12864-015-1749-0>
- 721 32. Smith RM, Webb A, Papp AC, Newman LC, Handelman SK, Suhy A, et al. Whole  
722 transcriptome RNA-Seq allelic expression in human brain. BMC Genomics [Internet].  
723 2013 Jan [cited 2015 Jan 2];14:571. Available from:  
724 [http://www.pubmedcentral.nih.gov/articlerender.fcgi?artid=3765493&tool=pmcentrez&ren  
725 dertype=abstract](http://www.pubmedcentral.nih.gov/articlerender.fcgi?artid=3765493&tool=pmcentrez&rendertype=abstract)
- 726 33. Ni G, Moser G, Ripke S, Neale BM, Corvin A, Walters JTR, et al. Estimation of Genetic  
727 Correlation via Linkage Disequilibrium Score Regression and Genomic Restricted  
728 Maximum Likelihood. Am J Hum Genet. 2018;102(6).
- 729 34. Roberts R. Genetics of coronary artery disease: an update. Methodist Debaquey  
730 Cardiovasc J [Internet]. 2014 Jan [cited 2015 Jul 28];10(1):7–12. Available from:  
731 [http://www.pubmedcentral.nih.gov/articlerender.fcgi?artid=4051327&tool=pmcentrez&ren  
732 dertype=abstract](http://www.pubmedcentral.nih.gov/articlerender.fcgi?artid=4051327&tool=pmcentrez&rendertype=abstract)

- 733 35. Musunuru K, Strong A, Frank-Kamenetsky M, Lee NE, Ahfeldt T, Sachs K V., et al. From  
734 noncoding variant to phenotype via SORT1 at the 1p13 cholesterol locus. Nature  
735 [Internet]. 2010 Aug 5 [cited 2020 Oct 22];466(7307):714–9. Available from:  
736 <https://pubmed.ncbi.nlm.nih.gov/20686566/>
- 737 36. Crouch DJM, Bodmer WF. Polygenic inheritance, GWAS, polygenic risk scores, and the  
738 search for functional variants. 2020;117(32):18924–33.

739

## 740 **Supporting information**

741 **S1 File. Fig 1 Gene Names.** Gene names corresponding to bar plot presented in Fig 1

742 B.

743 **S2 File. Example locus.** Example of a locus (*LIPA*) implicated by GWAS taken from  
744 ensemble.org. There are numerous annotated protein-coding and non-coding transcripts in  
745 close proximity and overlapping one another.

746 **S3 File. 58 CAD GWAS loci.** Table of 58 GWAS loci including tier designation, SNPs  
747 considered, GWAS annotation, and genes introduced by eQTL, sQTL, and position.

748 **S1 Fig. Expanding candidate genes process.** Flowchart portraying process of  
749 expanding candidate gene list from 75 to 245 using eQTL, sQTL, and physical position.

750 **S2 Fig. Tier assignment process.** Flowchart portraying process of assigning tiers to  
751 CAD GWAS loci.

752 **S3 Fig. eQTL, sQTL, position Venn diagram.** Venn diagram showing overlap in  
753 candidate genes derived from eQTL, sQTL, and position-based re-prioritization.

754 **S4 Fig. LIPA expression, CAD, and genotype in GTEx.** Comparison of LIPA  
755 expression in GTEx for those with and without heart disease based on rs142444 genotype.  
756 LIPA exhibits higher expression in those without heart disease only in the homozygous minor  
757 group (p value = 0.22).



### A rs7528419, SORT1 LOCUS



### B rs72689147, GUCY1A3 LOCUS



bioRxiv preprint doi: <https://doi.org/10.1101/2020.12.21.423751>; this version posted December 21, 2020. The copyright holder for this preprint (which was not certified by peer review) is the author/funder, who has granted bioRxiv a license to display the preprint in perpetuity. It is made available under aCC-BY 4.0 International license.



Figure



Figure



bioRxiv preprint doi: <https://doi.org/10.1101/2020.12.21.423751>; this version posted December 21, 2020. The copyright holder for this preprint (which was not certified by peer review) is the author/funder, who has granted bioRxiv a license to display the preprint in perpetuity. It is made available under aCC-BY 4.0 International license.



Figure
